# Supplementary material
Source: Springer Nature journal article supplement (https://www.springermedizin.de/resource/supplementary/12961_2002_1_MOESM7_ESM.pdf/9570802)

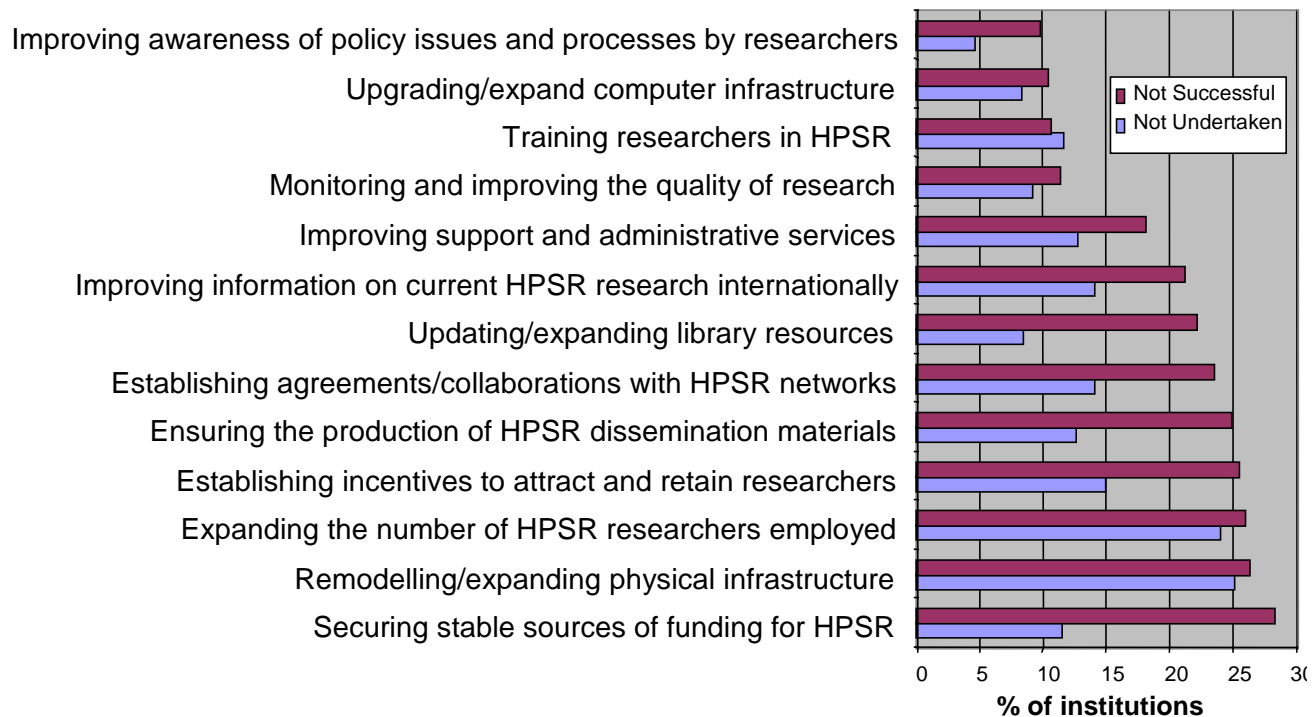

Supplement: MOESM7 [file 9570802]
